1     **Transcriptional program of memory B cell activation, broadly binding**  
2     **anti-influenza antibodies, and bystander activation after vaccination**  
3     **revealed by single-cell transcriptomics**  
4

5     **Authors:**

6     Felix Horns<sup>1</sup>, Cornelia L. Dekker<sup>2</sup>, Stephen R. Quake<sup>3,4\*</sup>  
7

8     **Affiliations:**

9     <sup>1</sup>Biophysics Graduate Program

10    <sup>2</sup>Department of Pediatrics

11    <sup>3</sup>Department of Bioengineering

12    <sup>4</sup>Department of Applied Physics

13    Chan Zuckerberg Biohub and Stanford University, Stanford, CA 94305, USA

14    \*Correspondence to: [steve@quake-lab.org](mailto:steve@quake-lab.org) (S.R.Q.)  
15

16     **Abstract:** Antibody memory protects humans from many diseases. Protective antibody  
17     memory responses require activation of transcriptional programs, cell proliferation, and  
18     production of antigen-specific antibodies, but how these aspects of the response are  
19     coordinated is poorly understood. We profiled the molecular and cellular features of the  
20     antibody response to influenza vaccination by integrating single-cell transcriptomics,  
21     longitudinal antibody repertoire sequencing, and antibody binding measurements. Single-  
22     cell transcriptional profiling revealed a program of memory B cell activation  
23     characterized by *CD11c* and *T-bet* expression associated with clonal expansion and  
24     differentiation toward effector function. Vaccination elicited an antibody clone which  
25     rapidly acquired broad high-affinity hemagglutinin binding during affinity maturation.  
26     Unexpectedly, many antibody clones elicited by vaccination do not bind vaccine,  
27     demonstrating non-specific activation of bystander antibodies by influenza vaccination.  
28     These results offer insight into how molecular recognition, transcriptional programs, and  
29     clonal proliferation are coordinated in the human B cell repertoire during memory recall.  
30

31     **Main Text:**

32     Antibody memory is a hallmark of adaptive immunity and confers life-saving  
33     protection against many pathogens. During initial encounter with a pathogen, clonal  
34     selection and affinity maturation focus the antibody repertoire onto variants that bind  
35     specifically to pathogen-derived antigens with high affinity, and these antibodies are  
36     preserved in memory B cells. In subsequent encounters, memory B cells are rapidly  
37     activated, leading to clonal expansion and differentiation to antibody-secreting cells. This  
38     robust immune response can prevent reinfection or reduce severity of disease.

39     Although a protective memory response requires coordination of antigen  
40     recognition, gene expression, and clonal expansion, studies linking these facets of the  
41     response have been lacking. Specifically, deep sequencing-based measurements of the  
42     population dynamics and clonal structure of the B cell repertoire have shown that  
43     vaccination typically induces rapid expansion of a small set of B cell clones within 7 days  
44     (1–3). However, the transcriptional programs of these expanded clones and the antigen  
45     specificity of their antibodies have not been characterized.

46 Analogously, antigen-resolved measurements, such as serum binding assays and  
47 antigen-specific cell sorting, have demonstrated that antigen-specific serum antibody (4,  
48 5), memory B cells (6), and antibody-secreting cells (7) become more abundant after  
49 vaccination. However, these approaches have not been able to resolve clonal  
50 relationships among antigen-specific cells, the population dynamics of these clones, or  
51 their gene expression programs.

52 Finally, bulk transcriptome measurements have detected transient expression  
53 signatures associated with memory recall after vaccination in blood (8, 9) and B cells  
54 (10), but it is not known how these transcriptional programs are related to clonal  
55 dynamics and antigen specificity within the B cell repertoire. Thus, an integrated portrait  
56 of how the memory response unfolds with cellular and molecular detail at the scale of the  
57 entire organism's antibody repertoire remains lacking, despite its importance for  
58 protective immunity and vaccine design.

59 To address these questions, we developed an integrative approach that combines  
60 information from single-cell transcriptomics, longitudinal antibody repertoire sequencing,  
61 and antibody binding measurements, and applied it to study the human antibody response  
62 to influenza vaccination. We tracked the population dynamics of B cell clones in a time  
63 course after vaccination and profiled transcriptomes of single B cells within those clones,  
64 revealing an activated memory B cell state associated with vaccine-elicited clonal  
65 expansion. We then assessed the relationship between clonal expansion and antigen  
66 specificity by expressing native human antibodies isolated from single B cells and  
67 characterizing their binding properties.

68

### 69 **Integrating single B cell phenotypes with clonal population dynamics after** 70 **vaccination**

71 We studied the antibody repertoire response of one healthy young adult (age 18)  
72 to seasonal influenza vaccination in 2012. Deep multimodal study of a single individual's  
73 vaccine response enabled us to extensively investigate the relationships between global  
74 repertoire structure and molecular function using a diverse suite of experimental  
75 techniques. To measure the population dynamics of the vaccine response, we sequenced  
76 the peripheral blood antibody repertoire (Rep-seq) at the time of vaccination and 1, 4, 7,  
77 9, and 11 days afterward (D0, D1, D4, D7, D9, and D11), as well as 3 and 5 days before  
78 vaccination (D-3 and D-5) (Figure 1A and Figure 1B), as we previously reported (3). We  
79 detected ~625,000 unique antibody heavy chain sequences belonging to ~55,000 clonal  
80 lineages. Vaccination induced rapid recall of 16 vaccine-responsive clones, which were  
81 defined as those having >50-fold expansion in unique sequences detected between D0  
82 and D7. These clones bear the hallmarks of memory B cells, including extensive somatic  
83 mutation, class-switched isotypes, and population genetic signatures of positive selection  
84 (3).

85 We also sequenced antibody heavy and light chain transcripts in single B cells  
86 purified from peripheral blood samples of the same subject at D7 and D9, which  
87 correspond to the peak of the memory response (Figure 1B). After quality filtering and  
88 computational removal of doublets, we obtained 94,259 single B cells having exactly one  
89 productive heavy chain and one productive light chain transcript (Figure S1A and Figure  
90 S1B). We detected cells producing antibodies of every class, and the majority of cells

91 produced IgM antibodies, as expected from pan-B cell purification, which includes naïve  
92 B cells (Figure S1C).

93 To connect single-cell phenotypes with clonal population dynamics, we mapped  
94 these single B cells to clones detected by Rep-seq using an established approach for  
95 identifying clonal lineages via single-linkage clustering (Figure S1D) (11, 12). Clones  
96 were identified in the Rep-seq repertoire for 8% of cells, with the nearest heavy chain  
97 complementarity determining region (HCDR3) exhibiting high identity ( $97\% \pm 3\%$ , mean  
98  $\pm$  s.d.) for these matches (Figure S1E). Matches were strongly enriched for class-  
99 switched isotypes and depleted for IgD, as expected for memory B cells (Figure S1F).  
100 The majority of cells did not match a clone in Rep-seq data because most cells are naïve  
101 B cells, as confirmed by transcriptome profiling below. Additionally, the resampling  
102 probability of low abundance memory B cell clones across replicate samples is low (1).  
103 Nevertheless, for clones detected in both measurements, quantification of clone size was  
104 highly consistent across the two methods (Figure 1C; Spearman's  $\rho = 0.57$ ,  $P < 10^{-91}$ ).

105 Based on the Rep-seq measurement of clonal population dynamics, we identified  
106 five vaccine-responsive clones that both expanded dramatically after vaccination ( $>50$   
107 fold-change from D0 to D7) and contained sequenced single cells. This included the two  
108 globally most abundant clones at the peak of recall at D7, and each clone comprised  
109  $>0.1\%$  of the repertoire at D7 (range 0.1 – 8%) (Figure 1D). Antibodies in these vaccine-  
110 responsive clones were mostly IgG (94%) and had extensive somatic hypermutation  
111 (mutation density  $3.8\% \pm 1.4\%$ , mean  $\pm$  s.d.). These results establish that the combination  
112 of longitudinal Rep-seq and single-cell sequencing captures a rich portrait of B cell  
113 population dynamics at the scale of the whole organism, and links single-cell phenotypes  
114 such as paired heavy-light chain antibody sequences with clonal population dynamics.

115 Because single-cell sequencing preserves the native pairing between heavy and  
116 light chain sequences, we were able to assess the fidelity of the widely-used strategy of  
117 clone identification based on heavy chain sequence alone by using the light chain as an  
118 independent marker of clonal identity. Light chain genes were highly concordant within  
119 the vast majority of clones, as evidenced by the majority light chain gene representing a  
120 very high proportion of cells within each clone (Figure S1G; median = 100%, mean  $\pm$  s.d.  
121 =  $90\% \pm 18\%$  for light chain constant region genes; similar results were found for light  
122 chain V and J genes). We observed that a minority of clones (16%) had substantial  
123 impurity based on the presence of cells containing a plurality of different light chain  
124 genes. We determined that these impure lineages were strongly enriched for short  
125 HCDR3 sequences (Figure S1H;  $P = 3.8 \times 10^{-91}$ , Mann-Whitney U test; median HCDR3  
126 length 14 AA in impure lineages, 16 AA in pure lineages) and usage of the *IGHJ4* gene,  
127 which contributes a longer templated insert to the HCDR3 and thus tends to reduce  
128 sequence diversity (Figure S1H;  $P = 5.1 \times 10^{-225}$ , Fisher's exact test; 64% *IGHJ4* usage in  
129 impure lineages, 28% in pure lineages). We conclude that the fidelity of clone  
130 identification based on clustering of heavy chain sequences is high for most clones. Clone  
131 assignment errors predominantly arise from low diversity compartments of the repertoire,  
132 and assignment can be improved by using light chain sequences when pairing  
133 information is available.

134

135 **Transcriptional program of vaccine-induced memory B cell activation**

136 We performed single-cell transcriptome profiling on 35,631 cells, comprising a  
137 subset of the cells for which we sequenced antibody transcripts (Figure 2A). We detected  
138 a median of 2,015 UMIs and 766 genes per cell (Figure S2A), as typical for microfluidic  
139 droplet-based single-cell sequencing (13). Similar transcriptional profiles were obtained  
140 across 4 technical replicates (Figure S2B) and these data were pooled for analysis. Using  
141 t-SNE visualization and DBSCAN clustering, we identified distinct immune cell types,  
142 which we manually annotated based on established type-specific genes (Figure 2B).  
143 Three clusters corresponded to CD4+ and CD8+ T cells and macrophages, which  
144 displayed specific expression of markers such as *CD3E* for T cells and *LYS* for  
145 macrophages (Figure S2D) and lacked antibody expression (Figure 2C). These cell types  
146 were present at low abundance due to the imperfect purity of B cell isolation and were  
147 not analyzed further. B cells formed two distinct clusters, which we annotated as memory  
148 B cells and naive B cells based on established markers and antibody isotype (Figure 2B).  
149 Memory B cells expressed *CD27* (Figure S2E) and made predominantly class-switched  
150 antibodies (Figure 2C and Figure S2C). Naive B cells expressed *TCL1A* (Figure S2E) and  
151 made exclusively IgM and IgD antibodies (Figure 2C and Figure S2C). In total, we  
152 analyzed 16,653 memory and 18,953 naive B cells.

153 To address how clonal population dynamics are related to transcriptome state, we  
154 mapped the single B cell transcriptomes to the clones identified using Rep-seq based on  
155 heavy chain sequence, as described above. Matches to clonal lineages were obtained  
156 almost exclusively for memory B cells as expected (Figure 2D). Remarkably, we found  
157 that cells belonging to vaccine-responsive clones had a distinct transcriptional profile  
158 characteristic of a small neighborhood within the memory B cell cluster (Figure 2D).  
159 Cells in this neighborhood expressed established genes related to B cell activation,  
160 including the activation marker *CD86* and the somatic hypermutation gene *AICDA*, also  
161 known as *AID* (Figure 2E, Figure 2F, and Figure S2E). Thus we annotated cells in this  
162 neighborhood as activated memory B cells, comprising 421 cells in total.

163 To define the transcriptional programs of B cell states, we identified genes  
164 exhibiting differential expression across naive, memory, and activated memory B cells.  
165 We found 755 differentially expressed genes between naive and memory B cells (FDR =  
166 0.1%, Mann-Whitney U test with Benjamini-Hochberg correction), including established  
167 markers such as *CD27* and *IGHD* (Figure 2E). About half of these genes were  
168 upregulated in naive B cells, while the other half were upregulated in memory B cells  
169 (Figure S2G). By contrast, we found 172 differentially expressed genes between memory  
170 and activated memory B cells, all of which were upregulated in activated memory B cells  
171 (Figure S2G). Dominant upregulation of genes in the activated memory state was  
172 consistently observed across a range of significance thresholds defining differential  
173 expression (Figure S2G). We also detected more genes (median 1,786) and more UMIs  
174 (median 5,517) in activated memory B cells than memory B cells (Figure S2F; median  
175 gene count in memory B cells = 849, UMI count = 2,406), possibly reflecting greater  
176 mRNA content due to elevated transcription. Together, these results suggest that the  
177 transcriptional program of memory B cell activation predominantly involves activation  
178 rather than deactivation of gene expression.

179 To characterize the activated memory B cell state, we first sought to identify  
180 transcription factors (TFs), which may be central regulators of the program of activation.  
181 We identified 6 TFs specifically expressed in activated memory B cells (Figure 2G).



182 These TFs include *T-bet*, also known as *TBX21* (Figure S2E), which is required for IgG2a  
183 class switching (14) and clearing chronic viral infections (15), and *Zbtb32*, which  
184 modulates the duration of memory B cell recall responses in mice (16).

185 Several cytokine receptors are downregulated in activated memory B cells (Figure  
186 2H). *IL4R* and *IL21R* are highly expressed in naive B cells, but downregulated in memory  
187 and activated memory B cells (Figure 2H and Figure S2E), suggesting that naive B cells  
188 are more responsive than memory or activated memory B cells to IL4 and IL21, which  
189 regulate class switching to IgG4 or IgE (17), and IgG1 or IgG3 (18), respectively. The  
190 chemokine receptor *CXCR4*, which controls entry to anatomical locations of B cell  
191 maturation, such as lymph nodes and Peyer's patches (19), is also progressively  
192 downregulated from naive to memory and activated memory B cells (Figure 2H).

193 Other genes related to humoral activation are upregulated in activated memory B  
194 cells. The chemokine receptor *CXCR3*, which is required for cell migration to sites of  
195 inflammation (20), is specifically expressed in activated memory B cells (Figure 2H and  
196 Figure S2E). Interestingly, *CD11c*, also known as *ITGAX*, is specifically expressed in  
197 activated memory B cells (Figure 2H), suggesting that this state overlaps with the  
198 recently described age/autoimmune-associated B cells (21, 22). Finally, *EBI3*, which is  
199 known to be expressed in germinal center B cells (23), is found exclusively in activated  
200 memory B cells (Figure 2F). Complete lists of differentially expressed genes across  
201 naive, memory, and activated memory B cells are shown in Table S1 and Table S2.  
202 Together, these results define a transcriptional program of memory B cell activation  
203 associated with vaccine-induced clonal expansion, which bears hallmarks of an effector B  
204 cell response.

### 205 **Many vaccine-responsive antibodies do not bind vaccine**

206 To study how clone dynamics and antigen specificity are related, we expressed  
207 and functionally characterized 21 antibodies obtained from single B cells within 5  
208 vaccine-responsive clones (Figure S3A). We first measured binding of these antibodies to  
209 the vaccine (trivalent influenza vaccine from the 2011–2012 flu season) by ELISA.  
210 Surprisingly, only 57% of the vaccine-responsive antibodies (12 of 21) and 40% of  
211 vaccine-responsive antibody clones (2 of 5) exhibited binding to vaccine (Figure 3 and  
212 Figure S3B). For the non-vaccine-binding antibodies, we further screened for binding by  
213 ELISA against a panel of purified influenza proteins, including hemagglutinins,  
214 neuraminidases, nucleoprotein, matrix protein, and non-structural proteins, but found no  
215 binding (Figure S3C). Notably, despite not binding vaccine or influenza proteins, these  
216 three clones expanded dramatically after vaccination (>62-fold) and were highly  
217 abundant at D7, including one clone which was the second most globally abundant clone,  
218 representing 6.7% of the repertoire at D7. These results indicate that many vaccine-  
219 responsive antibodies do not bind vaccine or purified components of the vaccine. This  
220 suggests that vaccination induced activation of some antibody clones in an antigen-  
221 independent manner. We found no binding of these non-vaccine-binding antibodies to a  
222 panel of common viral and bacterial antigens, such as herpes simplex, measles, and  
223 varicella zoster virus (Figure S3C), and we were unable to determine the specificities of  
224 these antibodies.  
225

226

### 227 **A broadly binding high-affinity anti-influenza antibody clone elicited by vaccination**

228 To determine the specificity of the vaccine-binding antibodies, we screened them  
229 for binding by ELISA against purified influenza proteins, including the major antigenic  
230 determinants of influenza virus, hemagglutinin (HA) and neuraminidase (NA). One  
231 vaccine-responsive clone, which we refer to as L3, displayed strong binding to diverse  
232 HA proteins, including the influenza A variants contained in the vaccine, H1  
233 A/California/7/2009 and H3 A/Perth/16/2009, as well as H5 and H9 variants (Figure 4A).  
234 These antibodies had similar binding strength and breadth as established broadly  
235 neutralizing antibodies MEDI8852 (24) and CR9114 (25) (Figure 4A). L3 antibodies use  
236 the *IGHV3-34* and *IGHJ4* genes, have a 19 AA HCDR3, and are heavily mutated ( $28 \pm 5$   
237 mutations from inferred germline heavy chain, mean  $\pm$  s.d.) (Figure S3A).

238 We measured the binding affinity of L3 antibodies to diverse H1 and H3 variants  
239 using biolayer interferometry. Most L3 antibodies bound with sub-nanomolar affinity to  
240 both H1 and H3, which are highly divergent HA variants drawn from the two major  
241 groups of influenza A virus and share only 44% amino acid identity (Figure 4C and  
242 Figure S4C; equilibrium binding constants [ $K_D$ ] from 18 nM to 50 pM). Thus, L3 broadly  
243 binds diverse hemagglutinin variants with high affinity. A second vaccine-binding clone,  
244 which we call L1, displayed strong but narrow binding specificity to HA B (Figure S3C)  
245 and we did not analyze this clone further.

246

#### 247 **Evolution of a broadly binding anti-influenza antibody clone**

248 To shed light on the evolutionary trajectories leading to broad high-affinity anti-  
249 influenza binding, we reconstructed the clonal evolution of L3 (Figure 4B). Using  
250 maximum-likelihood phylogenetic models, we reconstructed the ancestral sequences of  
251 the unmutated germline precursor and four intermediate ancestors (Figure S4A and  
252 Figure S4B), then expressed these antibodies and measured their binding affinities to  
253 diverse HAs. While the germline precursor bound weakly to H1 and H3 ( $K_D > 1 \mu\text{M}$ )  
254 (Figure S4E), the first intermediate ancestor A1 bound to both H1 and H3 with  
255 nanomolar affinity ( $K_D = 1.5 \text{ nM}$  and  $2 \text{ nM}$ , respectively) (Figure 4C), despite having  
256 acquired only 11 amino acid substitutions (6 in the heavy chain and 5 in the light chain)  
257 (Figure S4A).

258 To dissect the contributions of heavy and light chain mutations to binding affinity,  
259 we engineered variants of the high-affinity L3N6 antibody in which the heavy and light  
260 chain sequences were separately reverted to the respective germline precursor sequence  
261 (Figure S4A and Figure S4B). We found that germline reversion of the heavy chain  
262 greatly reduced binding affinity to both H1 and H3 ( $K_D > 1 \mu\text{M}$ ) (Figure 4C and Figure  
263 S4E). In contrast, germline reversion of the light chain minimally affected binding to H1  
264 and H3 ( $K_D = 27 \text{ nM}$  and  $10 \text{ nM}$ , respectively) (Figure 4C and Figure S4E). To further  
265 test the contribution of light chain mutations, we created a variant of L3N6 in which the  
266 light chain was swapped for a different IGK sequence originating from a distinct clonal  
267 lineage having a different L3CDR3 (Figure S4B). This alteration of the light chain also  
268 minimally affected binding to H1 and H3 ( $K_D = 8 \text{ nM}$  and  $94 \text{ nM}$ , respectively) (Figure  
269 4C and Figure S4E). These findings show that heavy chain mutations were  
270 predominantly responsible for affinity maturation, indicating that broad nanomolar-  
271 affinity binding was achieved via  $\leq 6$  amino acid substitutions in the heavy chain.

272 L3 antibodies therefore rapidly evolved broad high-affinity binding to diverse HA  
273 variants through a small number of somatic mutations. Affinity improvements were

274 predominantly driven by decreasing the dissociation rate, which varied ~10,000-fold  
275 across the clone, rather than increasing the association rate, which varied only ~10-fold  
276 (Figure S4D). We found evidence for an affinity ceiling: acquisition of mutations beyond  
277 the intermediate ancestor A1 did not substantially affect affinity and there was no trend  
278 toward enhanced affinity with additional mutations (across the range of 18 – 38  
279 mutations from the inferred germline IGH sequence) (Figure 4D; Spearman's rho = 0.25,  
280 P = 0.37). Instead, L3 antibody affinity evidently drifted neutrally after acquisition of  
281 high-affinity binding.

282 To determine how L3 antibodies bind HA, we performed cross-competition  
283 binding experiments using biolayer interferometry. We competed L3N1 and L3N6  
284 against a panel of broadly binding antibodies consisting of stem-binding antibodies  
285 CR9114 (25) and MEDI8852 (24), receptor-binding site antibodies CH65 (26) and  
286 H2897 (27), and lateral patch antibody 6649 (28). We found that L3N1 and L3N6 did not  
287 compete with any of these antibodies (Figure S5). This result indicates that the epitopes  
288 recognized by L3 antibodies do not overlap with any antibodies in this panel, suggesting  
289 that L3 achieves broad specificity by a distinct structural mechanism. Furthermore, the  
290 L3 epitope may be conserved across HA variants belonging to groups 1 and 2.

291 It has been proposed that the antibody memory response is biased towards  
292 antigens seen early in an individual's life, and this priming influences subsequent  
293 responses (29). To test this hypothesis using L3, we compared binding affinity to H1  
294 variants that circulated during the subject's childhood and adulthood. We found that  
295 extant antibodies of the L3 clone nearly all bound with higher affinity to the childhood  
296 strain (H1 New Caledonia/20/1999) than the adult strain (H1 California/07/2009) (Figure  
297 4D). This indicates that the affinity of a broad binding anti-HA antibody clone is biased  
298 towards antigenic variants associated with childhood exposure, supporting the hypothesis  
299 that affinity maturation most efficiently focuses the antibody repertoire on antigens  
300 encountered in early life, leaving an lasting imprint on subsequent responses.

301

## 302 Discussion

303 Mobilization of an effective antibody memory response requires coordination  
304 across scales, from antibody-antigen recognition and transcriptional activation in single  
305 cells to clonal population dynamics that globally remodel an organism's antibody  
306 repertoire. This complex, multi-scale nature of the immune system creates challenges for  
307 understanding its function. To address these challenges, we have developed an  
308 experimental approach that integrates single B cell sequencing with longitudinal antibody  
309 repertoire sequencing and biophysical measurements of antibody function. Our results  
310 show that this strategy offers a unified portrait of the molecular and cellular features of  
311 the memory B cell response to vaccination, giving insights into mechanisms of immune  
312 memory.

313 Much recent interest has focused on a functionally specialized B cell subset  
314 marked by *CD11c* and *T-bet* expression named “Age/autoimmune Associated B cells”  
315 (ABCs). B cells with these features are associated with viral infections, autoimmunity,  
316 and aging in mouse and human (21, 22, 30–32), but to our knowledge the phenotype has  
317 not been described as a transcriptional state with single-cell resolution. Using single-cell  
318 transcriptomics and longitudinal clone tracking, we have defined an activated memory B  
319 cell state, which displays hallmarks of an effector B cell response and shares many

320 features with ABCs, including high expression of *CD11c* (21, 22), *T-bet* (31), *FCRL4*,  
321 and *CXCR3* (30). Several genes that define this activated memory B cell state are directly  
322 involved in germinal center migration (*EBI3*) (23), somatic hypermutation (*AICDA*) (33),  
323 and class switching (*AICDA* and *Tbx21*) (14, 33), suggesting that these cells are poised  
324 for secondary affinity maturation. Our results indicate that these *CD11c*<sup>+</sup> *T-bet*<sup>+</sup> B cells  
325 are associated with vaccine-elicited clonal expansion in a healthy young adult human.  
326 These findings support the view that *CD11c*<sup>+</sup> *T-bet*<sup>+</sup> B cells are essential to health, but  
327 aberrant regulation of them can lead to autoimmunity. Defining their transcriptional  
328 program opens avenues to understanding their origins, function, and regulation, which  
329 may in turn reveal therapeutic targets in both pathogen immunity and autoimmunity.

330 Unexpectedly, several antibody clones elicited by vaccination did not bind  
331 vaccine. Formally, we cannot exclude that the lack of binding between recombinant  
332 vaccine-responsive antibodies and the vaccine in vitro is due to conformational changes  
333 occurring under physiological conditions. Notwithstanding this alternative explanation,  
334 our results suggest that bystander activation of memory B cells bearing non-vaccine  
335 specificities is common after influenza vaccination. Polyclonal activation of memory B  
336 cells bearing non-vaccine specificities after vaccination has previously been described at  
337 the level of serum antibody (34) and antibody-secreting cells (7). Similarly, infection  
338 with both measles and varicella induces non-specific B cell activation (35). Our results  
339 show that many, perhaps even the majority of, memory B cells elicited by influenza  
340 vaccination produce antibodies that do not bind the vaccine, revealing an unanticipated  
341 extent of this phenomenon. This extent comports with some previous studies based on  
342 single-cell cloning of antibody-secreting cells (7), but may have been underestimated in  
343 other studies that tested binding against limited panels of antigens (34, 36). Non-specific  
344 polyclonal activation has been proposed as a mechanism for maintenance of long-term  
345 immune memory, enabling memory cell proliferation in the absence of antigen encounter  
346 (37). We were not able to identify antigens for the non-vaccine-binding antibodies by  
347 screening against a panel of common viral and bacterial antigens; conclusive  
348 identification of non-vaccine specificities will require high-throughput screening  
349 methods. Nevertheless, our integrated strategy of single-cell and Rep-seq offers a direct  
350 route to characterization of these non-vaccine-specific yet vaccine-elicited antibodies.  
351 Our results also indicate that bystander activation is confined to a small number of clones  
352 by an unknown mechanism, perhaps related to the presence of activated T cells (38–40).

353 We discovered a broadly binding anti-hemagglutinin antibody clone in which  
354 fewer than six somatic mutations in the heavy chain alone was sufficient to confer broad  
355 high-affinity binding, offering a striking example of rapid affinity maturation. Together  
356 with prior examples of influenza antibodies that emerged via a small number of  
357 mutations (41, 42), this suggests that a single-dose vaccine could be sufficient to confer  
358 lasting protection to influenza. Unlike prior examples (41, 42), L3 does not use the heavy  
359 chain variable region *VH1-69* gene, potentially opening a new target for germline-  
360 targeting immunogens. L3 antibodies may bind a distinct epitope compared with  
361 previously identified classes of broadly binding anti-HA antibodies (24–28), suggesting  
362 that structural characterization of the interaction may reveal a new site of vulnerability on  
363 HA.

364

365 **References:**



- 366 1. Vollmers C, Sit RV, Weinstein JA, Dekker CL, Quake SR (2013) Genetic  
367 measurement of memory B-cell recall using antibody repertoire sequencing.  
368 *Proceedings of the National Academy of Sciences* 110(33):13463–13468.
- 369 2. Jiang N, et al. (2013) Lineage Structure of the Human Antibody Repertoire in  
370 Response to Influenza Vaccination. *Science Translational Medicine*  
371 5(171):171ra19-171ra19.
- 372 3. Horns F, Vollmers C, Dekker CL, Quake SR (2019) Signatures of selection in the  
373 human antibody repertoire: Selective sweeps, competing subclones, and neutral  
374 drift. *PNAS* 116(4):1261–1266.
- 375 4. Treanor J, et al. (2002) Evaluation of a single dose of half strength inactivated  
376 influenza vaccine in healthy adults. *Vaccine* 20(7–8):1099–1105.
- 377 5. Belshe RB, et al. (2004) Serum Antibody Responses after Intradermal Vaccination  
378 against Influenza. *New England Journal of Medicine* 351(22):2286–2294.
- 379 6. Crotty S, Aubert RD, Glidewell J, Ahmed R (2004) Tracking human antigen-specific  
380 memory B cells: a sensitive and generalized ELISPOT system. *J Immunol Methods*  
381 286(1–2):111–122.
- 382 7. Wrammert J, et al. (2008) Rapid cloning of high-affinity human monoclonal  
383 antibodies against influenza virus. *Nature* 453(7195):667–671.
- 384 8. Gaucher D, et al. (2008) Yellow fever vaccine induces integrated multilineage and  
385 polyfunctional immune responses. *Journal of Experimental Medicine*  
386 205(13):3119–3131.
- 387 9. Li S, et al. (2014) Molecular signatures of antibody responses derived from a systems  
388 biology study of five human vaccines. *Nature Immunology* 15(2):195–204.
- 389 10. Henn AD, et al. (2013) High-Resolution Temporal Response Patterns to Influenza  
390 Vaccine Reveal a Distinct Human Plasma Cell Gene Signature. *Scientific Reports*  
391 3:2327.
- 392 11. Horns F, et al. (2016) Lineage tracing of human B cells reveals the in vivo landscape  
393 of human antibody class switching. *eLife* 5:e16578.
- 394 12. Gupta NT, et al. (2017) Hierarchical Clustering Can Identify B Cell Clones with High  
395 Confidence in Ig Repertoire Sequencing Data. *Journal of Immunology* 198(6):2489–  
396 2499.
- 397 13. Single-cell transcriptomics of 20 mouse organs creates a Tabula Muris (2018) *Nature*  
398 562(7727):367.
- 399 14. Wang NS, et al. (2012) Divergent transcriptional programming of class-specific B  
400 cell memory by T-bet and ROR $\alpha$ . *Nature Immunology* 13(6):604–611.
- 401 15. Barnett BE, et al. (2016) Cutting Edge: B Cell–Intrinsic T-bet Expression Is Required  
402 To Control Chronic Viral Infection. *The Journal of Immunology*:1500368.
- 403 16. Jash A, et al. (2016) ZBTB32 Restricts the Duration of Memory B Cell Recall  
404 Responses. *The Journal of Immunology*:1600882.
- 405 17. Stavnezer J (1996) Immunoglobulin class switching. *Curr Opin Immunol* 8(2):199–  
406 205.
- 407 18. Pène J, et al. (2004) Cutting edge: IL-21 is a switch factor for the production of IgG1  
408 and IgG3 by human B cells. *J Immunol* 172(9):5154–5157.
- 409 19. Okada T, et al. (2002) Chemokine requirements for B cell entry to lymph nodes and  
410 Peyer’s patches. *J Exp Med* 196(1):65–75.



- 411 20. Lacotte S, Brun S, Muller S, Dumortier H (2009) CXCR3, Inflammation, and  
412 Autoimmune Diseases. *Annals of the New York Academy of Sciences* 1173(1):310–  
413 317.
- 414 21. Rubtsov AV, et al. (2011) Toll-like receptor 7 (TLR7)-driven accumulation of a  
415 novel CD11c<sup>+</sup> B-cell population is important for the development of autoimmunity.  
416 *Blood* 118(5):1305–1315.
- 417 22. Hao Y, O’Neill P, Naradikian MS, Scholz JL, Cancro MP (2011) A B-cell subset  
418 uniquely responsive to innate stimuli accumulates in aged mice. *Blood*  
419 118(5):1294–1304.
- 420 23. Larousserie F, et al. (2006) Variable expression of Epstein-Barr virus-induced gene 3  
421 during normal B-cell differentiation and among B-cell lymphomas. *J Pathol*  
422 209(3):360–368.
- 423 24. Kallewaard NL, et al. (2016) Structure and Function Analysis of an Antibody  
424 Recognizing All Influenza A Subtypes. *Cell* 166(3):596–608.
- 425 25. Dreyfus C, et al. (2012) Highly conserved protective epitopes on influenza B viruses.  
426 *Science* 337(6100):1343–1348.
- 427 26. Whittle JRR, et al. (2011) Broadly neutralizing human antibody that recognizes the  
428 receptor-binding pocket of influenza virus hemagglutinin. *PNAS* 108(34):14216–  
429 14221.
- 430 27. Liu Y, et al. (2017) CryoEM Structure of an Influenza Virus Receptor-Binding Site  
431 Antibody–Antigen Interface. *Journal of Molecular Biology* 429(12):1829–1839.
- 432 28. Raymond DD, et al. (2018) Conserved epitope on influenza-virus hemagglutinin head  
433 defined by a vaccine-induced antibody. *PNAS* 115(1):168–173.
- 434 29. Schmidt AG, et al. (2015) Immunogenic stimulus for germline precursors of  
435 antibodies that engage the influenza hemagglutinin receptor-binding site. *Cell*  
436 *Reports* 13(12):2842–2850.
- 437 30. Moir S, et al. (2008) Evidence for HIV-associated B cell exhaustion in a  
438 dysfunctional memory B cell compartment in HIV-infected viremic individuals. *J*  
439 *Exp Med* 205(8):1797–1805.
- 440 31. Rubtsova K, Rubtsov AV, Dyk LF van, Kappler JW, Marrack P (2013) T-box  
441 transcription factor T-bet, a key player in a unique type of B-cell activation essential  
442 for effective viral clearance. *PNAS* 110(34):E3216–E3224.
- 443 32. Rubtsova K, et al. (2017) B cells expressing the transcription factor T-bet drive  
444 lupus-like autoimmunity. *J Clin Invest* 127(4):1392–1404.
- 445 33. Muramatsu M, et al. (2000) Class switch recombination and hypermutation require  
446 activation-induced cytidine deaminase (AID), a potential RNA editing enzyme. *Cell*  
447 102(5):553–563.
- 448 34. Bernasconi NL, Traggiai E, Lanzavecchia A (2002) Maintenance of Serological  
449 Memory by Polyclonal Activation of Human Memory B Cells. *Science*  
450 298(5601):2199–2202.
- 451 35. Arneborn P, Biberfeld G, Forsgren M, von Stedingk LV (1983) Specific and non-  
452 specific B cell activation in measles and varicella. *Clin Exp Immunol* 51(1):165–  
453 172.
- 454 36. Lee FE-H, et al. (2011) Circulating Human Antibody-Secreting Cells during  
455 Vaccinations and Respiratory Viral Infections Are Characterized by High

- 456 Specificity and Lack of Bystander Effect. *The Journal of Immunology* 186(9):5514–  
457 5521.
- 458 37. Moticka EJ, Streilein JW (1978) Hypothesis: Nonspecific polyclonal activation of  
459 memory B cells by antigen as a mechanism for the preservation of long term  
460 immunologic anamnesis. *Cellular Immunology* 41(2):406–413.
- 461 38. Lanzavecchia A, Parodi B, Celada F (1983) Activation of human B lymphocytes:  
462 frequency of antigen-specific B cells triggered by alloreactive or by antigen-specific  
463 T cell clones. *Eur J Immunol* 13(9):733–738.
- 464 39. Juy D, Sterkers G, Gomez A, Zelizewski D, Lévy J-P (1987) Polyclonal B-cell  
465 activation by influenza A/Texas virus-specific human T-cell clones. *Annales de*  
466 *l'Institut Pasteur / Immunologie* 138(3):371–382.
- 467 40. Jasiulewicz A, et al. (2015) Homeostatic ‘bystander’ proliferation of human  
468 peripheral blood B cells in response to polyclonal T-cell stimulation in vitro. *Int*  
469 *Immunol* 27(11):579–588.
- 470 41. Lingwood D, et al. (2012) Structural and genetic basis for development of broadly  
471 neutralizing influenza antibodies. *Nature* 489(7417):566–570.
- 472 42. Pappas L, et al. (2014) Rapid development of broadly influenza neutralizing  
473 antibodies through redundant mutations. *Nature* 516(7531):418–422.
- 474 43. Ye J, Ma N, Madden TL, Ostell JM (2013) IgBLAST: an immunoglobulin variable  
475 domain sequence analysis tool. *Nucleic Acids Research* 41(Web Server issue):W34–  
476 W40.
- 477 44. Altschul SF, Gish W, Miller W, Myers EW, Lipman DJ (1990) Basic local alignment  
478 search tool. *Journal of Molecular Biology* 215(3):403–410.
- 479 45. Dobin A, et al. (2013) STAR: ultrafast universal RNA-seq aligner. *Bioinformatics*  
480 29(1):15–21.
- 481 46. van der Maaten L, Hinton G (2008) Visualizing Data using t-SNE. *Journal of*  
482 *Machine Learning Research* 9:2579–2605.
- 483 47. Ester M, Kriegel H-P, Sander J, Xu X (1996) A Density-based Algorithm for  
484 Discovering Clusters a Density-based Algorithm for Discovering Clusters in Large  
485 Spatial Databases with Noise. *Proceedings of the Second International Conference*  
486 *on Knowledge Discovery and Data Mining, KDD'96*. (AAAI Press), pp 226–231.
- 487 48. Wolf FA, Angerer P, Theis FJ (2018) SCANPY: large-scale single-cell gene  
488 expression data analysis. *Genome Biology* 19(1):15.
- 489 49. Kluyver T, et al. (2016) Jupyter Notebooks – a publishing format for reproducible  
490 computational workflows. *Positioning and Power in Academic Publishing: Players,*  
491 *Agents and Agendas*, eds Loizides F, Schmidt B (IOS Press), pp 87–90.
- 492 50. Edgar RC (2004) MUSCLE: multiple sequence alignment with high accuracy and  
493 high throughput. *Nucleic Acids Research* 32(5):1792–1797.
- 494 51. Price MN, Dehal PS, Arkin AP (2010) FastTree 2 – Approximately Maximum-  
495 Likelihood Trees for Large Alignments. *PLoS ONE* 5(3):e9490.

#### 496 497 **Acknowledgments:**

498 We thank Peter Kim and Derek Croote for helpful discussions, 10X Genomics for  
499 providing reagents for single-cell sequencing, Krista McCutcheon for expressing  
500 antibodies, Payton Weidenbacher for discussions and providing antibodies and influenza  
501 proteins, and Harry Greenberg and Caiqiu Zhang for providing trivalent inactivated

502 influenza vaccine. This work was supported by NIH U19A1057229 (S.R.Q.) and the  
 503 National Science Foundation Graduate Research Fellowship Program (F.H.). The authors  
 504 declare no competing interests.

505  
 506  
 507

**Figures:**

Figure 1

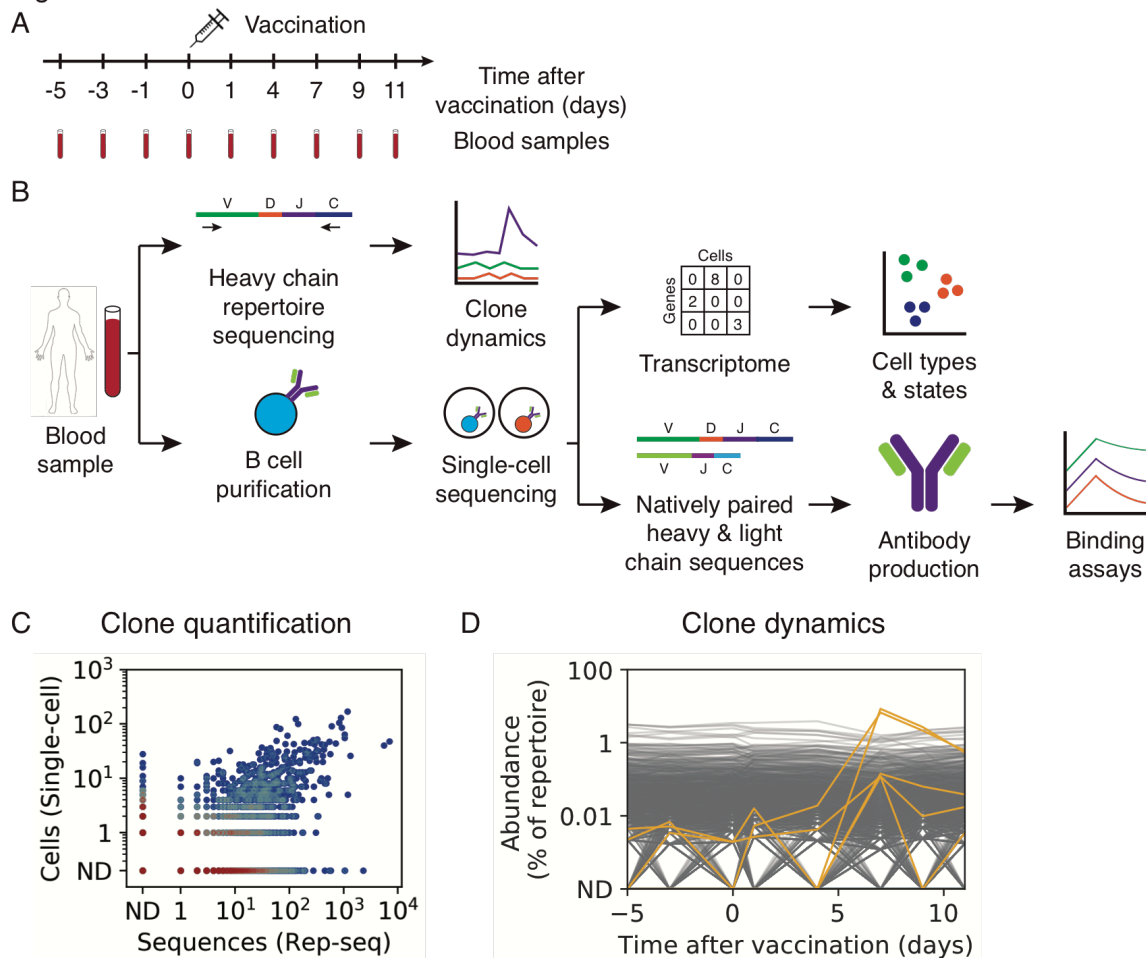

508  
 509  
 510  
 511  
 512  
 513  
 514  
 515  
 516  
 517

**Figure 1. Characterization of B cell response to influenza vaccination using integrated single-cell and antibody repertoire sequencing.**

(A) Study design. (B) Experiment workflow. (C) Comparison of clonal abundance measurements across platforms, showing cells detected by single-cell sequencing and sequences detected by Rep-seq within each clone. Color indicates density of clones. ND, not detected. (D) Population dynamics of B cell clones. Each line shows a clone. Yellow lines indicate vaccine-responsive clones (>50-fold expansion from D0 to D7 and >0.1% of repertoire at D7).

Figure 2

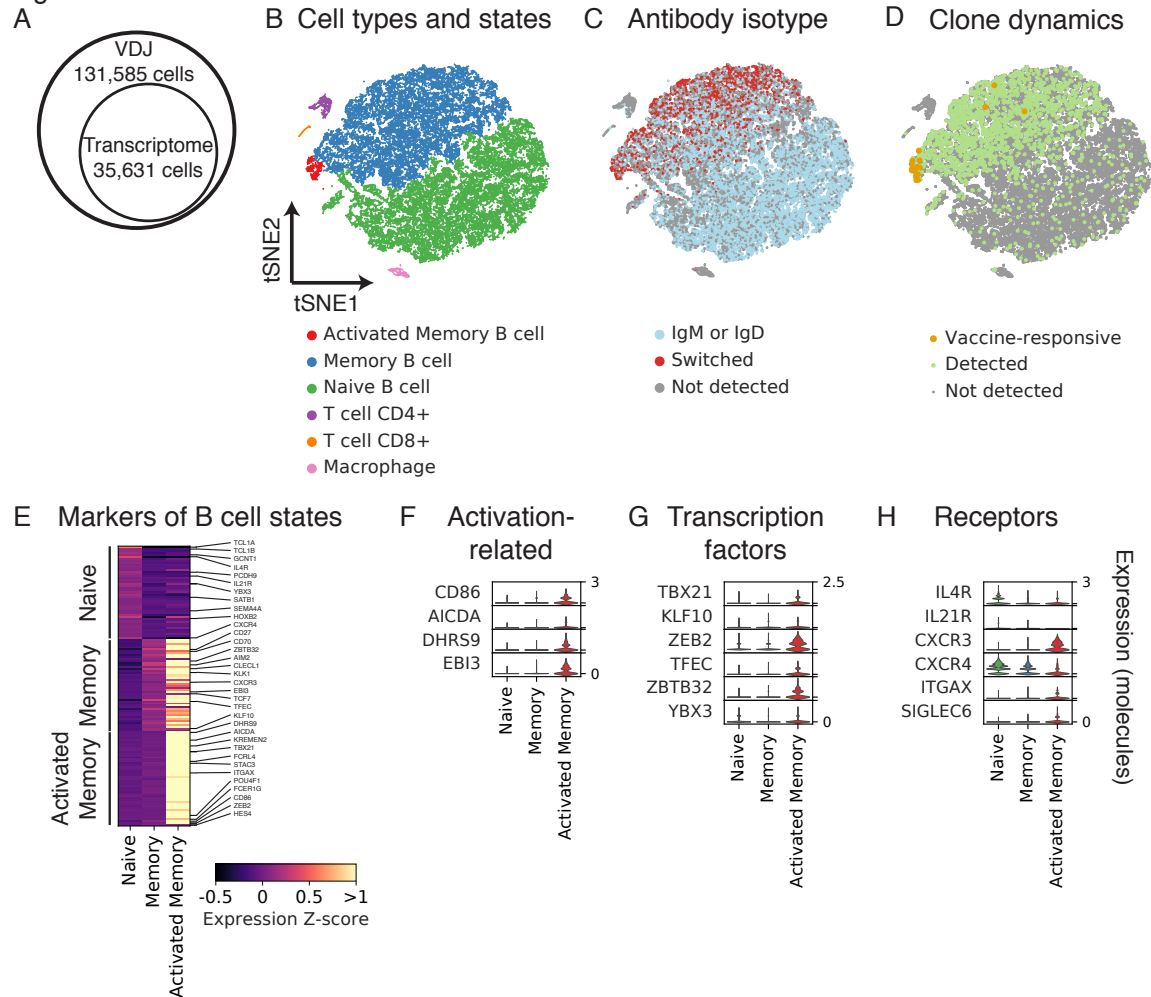

518

519 **Figure 2. Characterization of gene expression in single B cells isolated from**  
 520 **peripheral blood after influenza vaccination.**

521 (A) Number of cells analyzed using single-cell antibody gene sequencing (VDJ) or  
 522 transcriptome profiling. (B–D) Principal components analysis and t-distributed Stochastic  
 523 Neighbor Embedding (tSNE) separates cells into distinct clusters. Each dot is a cell,  
 524 colored by type or state revealed by gene expression profile (B), antibody isotype as  
 525 revealed by antibody sequencing (C), or clonal population dynamics as revealed by Rep-  
 526 seq (D). (E) Differential expression analysis identifies markers of distinct B cell states.  
 527 Genes of immunological interest are labeled. (F–H) Gene expression distributions in  
 528 distinct B cell states of established immune activation-related genes (F), transcription  
 529 factors (G), and signaling receptors (H).

530

Figure 3

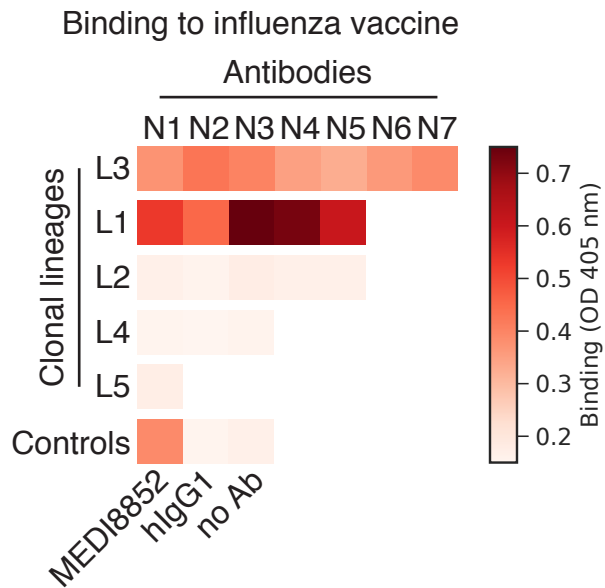

531  
532  
533  
534  
535  
536  
537

**Figure 3. Binding of influenza vaccine-responsive antibodies to vaccine.**

Binding of 21 monoclonal antibodies from 5 clones to the trivalent inactivated influenza vaccine from 2011–2012 season was measured using enzyme-linked immunosorbent assay (ELISA), revealing that many vaccine-responsive antibodies do not bind vaccine. OD, optical density; hIgG1, human IgG1.



Figure 4

A Binding to influenza hemagglutinin variants

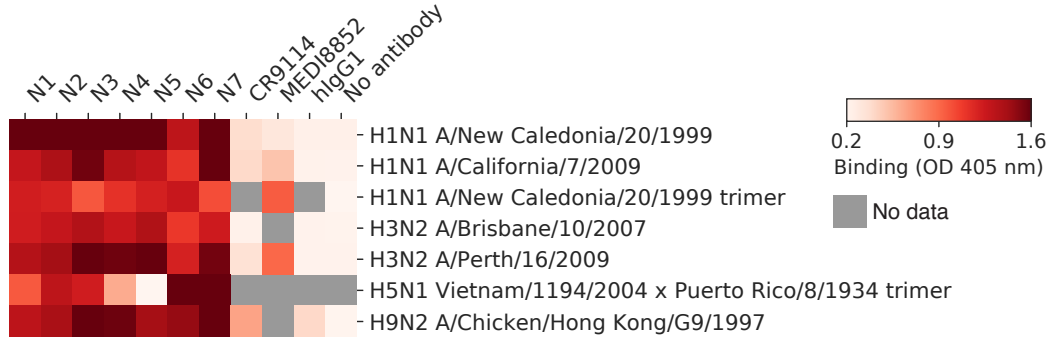

B Reconstructing evolutionary history

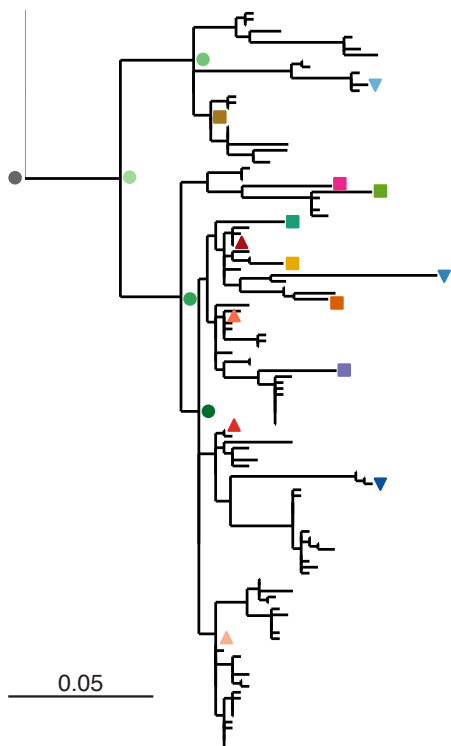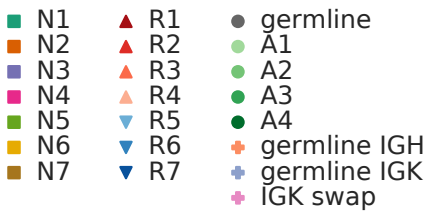

C Binding affinity to diverse hemagglutinins

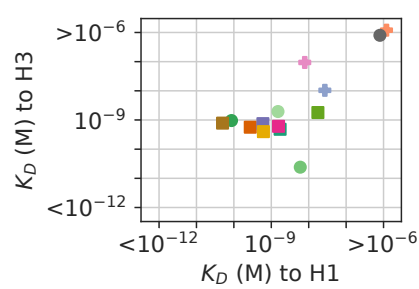

D

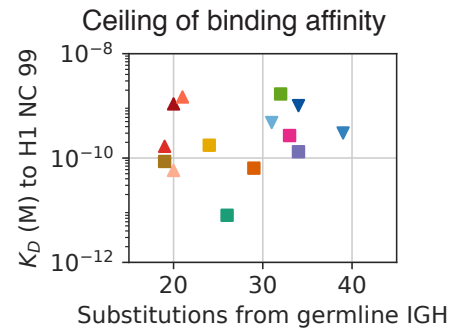

E Binding affinity to childhood versus adult strains

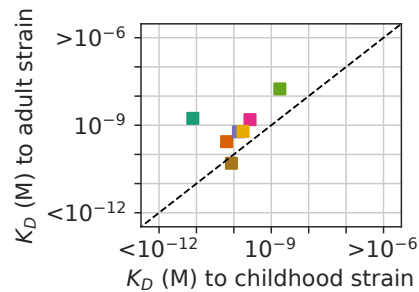

538

539

540

**Figure 4. Reconstructing evolution of a broadly binding high-affinity anti-influenza antibody clone.**

541

(A) Binding of antibodies from the L3 clone to a panel of influenza hemagglutinin (HA)

542

variants was measured using ELISA. OD, optical density; hIgG1, human IgG1. (B)

543

Evolutionary history of L3 depicted as a maximum-likelihood phylogeny based on heavy

544

chain sequence. Markers indicate antibodies detected by single-cell sequencing (N1–7) or

545

repertoire sequencing (R1–7), or reconstructed ancestral sequences (germline and A1–4).

546

(C) Equilibrium constants ( $K_D$ ) of binding between L3 antibody variants and H1

547 (A/California/7/2009) and H3 (A/Perth/16/2009) hemagglutinin variants, as determined  
548 by biolayer interferometry. L3 antibodies include extant sequences (N1–7), reconstructed  
549 ancestral sequences (germline and A1–4), and engineered variants having the L3N6  
550 sequences, but with heavy chain reverted to the inferred germline sequence (germline  
551 IGH), light chain reverted to the inferred germline sequence (germline IGK), or a light  
552 chain sequence substituted from a different clone (IGK swap). Jitter was added to  
553 germline and germline IGH to improve visualization of the data points. **(D)** Equilibrium  
554 constants of binding between L3 antibodies compared with extent of somatic  
555 hypermutation. **(E)** Equilibrium constants of binding between L3 antibodies and H1  
556 variants from childhood (A/New Caledonia/20/1999) and adulthood  
557 (A/California/7/2009). Dashed line indicates equal  $K_D$  for binding to both variants.  
558

### 559 **Supplementary Materials:**

560 Materials and Methods

561 Figures S1-S5

562 Tables S1-S2

563

### 564 **Materials and Methods:**

565

#### 566 Study subject

567 Study subject gave informed consent and protocols were approved by the Stanford  
568 Institutional Review Board. Subject was a female human aged 18 who was recruited in  
569 2012. The subject was apparently healthy and showed no signs of disease.  
570

#### 571 Sample collection

572 As previously described (3), blood was drawn by venipuncture, then peripheral blood  
573 mononuclear cells (PBMCs) were isolated using a Ficoll gradient and frozen in 10%  
574 (vol/vol) DMSO and 40% fetal bovine serum (FBS) according to Stanford Human  
575 Immune Monitoring Center protocol. Subject was vaccinated with the 2011–2012  
576 seasonal trivalent inactivated influenza vaccine. Blood was collected 3 and 5 days before  
577 vaccination (D-3 and D-5); immediately before vaccination (D0); and 1, 4, 7, 9, and 11  
578 days afterwards (D1, D4, D7, D9, D11).  
579

#### 580 Antibody repertoire sequencing

581 Antibody repertoire sequencing was previously performed on samples from all timepoints  
582 and preprocessed data was downloaded (3). Briefly, PBMCs were thawed and RNA was  
583 extracted. This RNA was reverse transcribed using immunoglobulin heavy chain constant  
584 region-specific primers and cDNA was amplified by PCR. UMIs were incorporated  
585 during reverse transcription and PCR. These libraries were sequenced using the Illumina  
586 HiSeq 2500 and MiSeq platforms using paired-end 101 or 300 bp reads, respectively.  
587 Consensus-based error correction was performed using UMIs. Sequences were annotated  
588 with V and J germline gene usage using IgBlast (43) and isotype using BLASTN (44).  
589 Clonal lineages were identified based on V and J gene usage, HCDR3 length, and  
590 HCDR3 sequence composition. Dynamics of clones were determined by comparing  
591 fractional abundance across study timepoints. As in our previous study (3), vaccine-

592 responsive clones were identified as those having >50-fold expansion from D0 to D7 and  
593 composing >0.1% of the repertoire at D7.

594

#### 595 Single-cell isolation and sequencing

596 PBMCs from D7 and D9, which correspond to the peak of the B cell memory recall  
597 response, were thawed. B cells were magnetically enriched using the B Cell Isolation Kit  
598 II (Miltenyi). Single cells were encapsulated in droplets using 16 lanes of the Chromium  
599 device (10X Genomics) with target loading of 14,000 cells per lane. Reverse transcription  
600 and cDNA amplification were performed using the Single Cell V(D)J kit (10X  
601 Genomics). In 12 lanes, direct enrichment of VDJ was performed. In the remaining 4  
602 lanes, VDJ and gene expression measurement was performed; these 4 lanes were  
603 considered technical replicates. All steps were done according to manufacturer's  
604 instructions, except with additional cycles of polymerase chain reaction (PCR) (19 total  
605 cycles for direct enrichment of VDJ; 22 total cycles for VDJ and gene expression). 50 ng  
606 of cDNA was used as input for library preparation. Libraries were sequenced using the  
607 Illumina NextSeq 500 platform with paired-end reads for VDJ of 150 bp each and for  
608 gene expression of 26 bp and 98 bp.

609

#### 610 Preprocessing of single-cell sequence data

611 Sequences were preprocessed to map reads to the human reference genome (GRCh38)  
612 using STAR 2.5.1b (45), count molecules aligning to each gene, and assemble antibody  
613 heavy and light chain transcripts within cellranger 2.1.0. To distinguish bona fide single  
614 cells from multiplets, we examined the number of productive heavy and light chain  
615 contigs assembled for each cell barcode. Single B cells were identified by the presence of  
616 a single productive heavy chain and a single productive light chain, yielding a total of  
617 94,259 single B cells for analysis. All other cells were excluded from further analysis.

618

#### 619 Mapping single B cells into clones

620 Single B cells were mapped to clones using a custom algorithm similar to that used for  
621 identification of clones previously (3, 11). Sequences detected by repertoire sequencing  
622 ( $n = 625,750$ ) were annotated for V and J gene usage, HCDR3 length, and HCDR3  
623 sequence and formed the database of subject sequences. The heavy chain variable region  
624 sequence from each single B cell was used as a query to search this database. For each  
625 query, the set of subjects sharing the query's V and J genes and CDR3 length was  
626 identified. Within this set, the identity between the query and subject sequences within  
627 the HCDR3 and outside the HCDR3 were calculated based on Hamming distance, and  
628 hits were defined as having >90% nucleotide identity in both regions. Previous studies  
629 have demonstrated that this cutoff of sequence identity enables identification of clonally  
630 related sequences with high sensitivity and specificity (11, 12). This yielded 8,377 single  
631 B cells that had matching clones detected by repertoire sequencing.

632

633 Fidelity of clonal clustering was assessed using the light chain as an independent  
634 marker of clonal identity. In clones having multiple B cells detected by single-cell  
635 sequencing, the percentage of cells possessing the dominant light chain was determined.  
636 Impure clones were identified as those having <80% of cells within the clone sharing the  
637 dominant light chain. All of the vaccine-responsive clones were pure.

637

### 638 Analysis of gene expression in single cells

639 Gene expression profiles were log-transformed and normalized to counts per million  
640 molecules. Dimensionality reduction using principal components analysis (PCA)  
641 retaining the top 10 principal components followed by t-distributed Stochastic Neighbor  
642 Embedding (tSNE; perplexity = 30, theta = 0.5, max\_iter = 1,000) (46) were performed  
643 using cellranger 2.1.0. Clusters were identified using Density-Based Spatial Clustering of  
644 Applications with Noise (DBSCAN; eps = 0.66, min\_samples = 10) (47) and annotated  
645 based on expression of established marker genes for each cell type. Differentially  
646 expressed genes were identified using the negative binomial exact test adjusted for  
647 multiple testing using the Benjamini-Hochberg procedure as implemented in Loupe 2.0.0  
648 (10X Genomics). For visualization of differential expression, the Z-score of expression of  
649 each group of cells was computed in comparison with the mean and standard deviation of  
650 expression in all other cells. Data visualization and analysis were performed using  
651 Scanpy (48) within JupyterLab (49).

652

### 653 Reconstructing the evolutionary history of antibody clone L3

654 Evolutionary analysis was conducted sequences in clone L3 obtained by repertoire  
655 sequencing using paired-end 300 bp reads (n = 125) and single-cell sequencing (n = 7).  
656 Sequences were initially aligned in an ungapped manner using the start and end positions  
657 of the HCDR3 as anchor points. This alignment was refined using MUSCLE 3.8.31 with  
658 “-refine -maxiters 1 -diags -gapopen -5000” (50), then trimmed to remove positions  
659 which were only covered by single-cell sequencing contigs (which are substantially  
660 longer than repertoire sequencing assemblies). We added an inferred germline sequence  
661 consisting of the reference heavy chain V and J genes and the consensus of the alignment  
662 for the untemplated regions of the HCDR3. Phylogenetic reconstruction was performed  
663 using FastTree 2.1.7 with “-nt -gtr” (51). We concatenated light chain sequences to this  
664 alignment, then performed reconstruction by maximum-likelihood assuming equal rates  
665 for all mutations.

666 To assess the contribution of heavy and light chain mutations to binding, we  
667 engineered variants of the high-affinity antibody L3N6 by substituting either the inferred  
668 germline heavy (germline IGH) or light (germline IGK) chain sequence. We also  
669 substituted the light chain with a randomly chosen sequence from a different clonal  
670 lineage that used the same VK gene, but had a distinct LCDR3 (IGK swap). For cloning  
671 and expression of antibodies derived from repertoire sequencing (R1–7), we used the  
672 light chain sequence originating from the single cell nearest the selected antibody, using  
673 the metric of heavy chain nucleotide sequence identity. These antibodies were chosen to  
674 span a wide range of somatic mutation levels.

675

### 676 Recombinant antibody expression

677 Recombinant antibodies were cloned and expressed by Genscript. Briefly, selected  
678 antibodies were codon-optimized for human expression. These DNA sequences were  
679 synthesized and cloned into heavy and light chain pcDNA3.4 expression vectors. Heavy  
680 chains were expressed as human IgG1 and light chains were expressed as either human  
681 IGK or IGL as appropriate. Vectors were transiently transfected in HEK293-6E cells and  
682 antibodies were purified from supernatant using Robocolumn Eshmuno A (EMD  
683 Millipore) or Monofinity A Resin prepacked columns (Genscript). Purity generally >95%

684 was confirmed using SDS-PAGE and immunoblots under reducing and non-reducing  
685 conditions.

686

#### 687 Antigens for binding measurements

688 Fluzone trivalent inactivated influenza vaccine from the 2011–2012 flu season (Sanofi  
689 Pasteur) containing H1N1 A/California/7/2009, H3N2 A/Perth/16/2009, and  
690 B/Brisbane/60/2008 was obtained as a gift from Dr. Harry Greenberg. Purified influenza  
691 proteins expressed in human cells (typically HEK293) where possible, otherwise  
692 baculovirus or *E. coli*, were purchased from Sino Biological (11683-V08H, 11085-V08H,  
693 11056-V08H, 40043-V08H, 11048-V08H, 40104-V08H, 40036-V08H, 11053-V08H,  
694 40197-V07H, 40017-V07H, 40569-V07H, 40502-V07B, 40205-V08B, 40499-V08B,  
695 40010-V07E, 40107-V08E, 40011-V07E, 40012-VNAE). Viruses inactivated by  
696 irradiation or formaldehyde treatment were purchased from Biorad (PIP005, PIP009,  
697 PIP010, PIP013, PIP014, PIP023, PIP008, PIP015, PIP016). Tetanus toxin was  
698 purchased from Sigma Aldrich (T3194).

699

#### 700 Binding measurements using ELISA

701 Semi-quantitative measurements of binding were carried out using enzyme-linked  
702 immunosorbent assay (ELISA). Antigen was immobilized on clear polystyrene 96- or  
703 384-well MaxiSorp plates (ThermoFisher) by overnight incubation at 4 C at 2 ng/uL  
704 diluted in phosphate-buffered saline (PBS) pH 7.4, then three washes were performed.  
705 When vaccine was used as antigen, vaccine was immobilized at a 50-fold dilution in PBS  
706 pH 7.4. The plate was incubated for 2 hours at room temperature with blocking buffer  
707 (PBS pH 7.4 with 0.05% Tween-20 and 2% bovine serum albumin [BSA]), then washed  
708 twice. The plate was incubated with primary antibody diluted to 2 ng/uL unless otherwise  
709 noted in blocking buffer for 2 hours at room temperature, then washed four times. The  
710 plate was incubated with detection antibody (mouse anti-human IgG1 Fc conjugated to  
711 horseradish peroxidase clone HP6069; ThermoFisher) for 2 hours at room temperature,  
712 then washed five times. All washes consisted of 5 minute incubation with PBS pH 7.4  
713 with 0.05% Tween-20. Detection was performed by adding 1-Step ABTS Substrate  
714 (ThermoFisher), then measuring absorbance at 405 nm at 1 or 3 min intervals for 45 min.  
715 Time point used for analysis was determined based on the dynamic range of the data  
716 (increasing signal, but no saturation). Positive controls included the broadly binding anti-  
717 influenza antibodies MEDI8852 (24) and CR9114 (25) obtained as a gift from Dr. Peter  
718 Kim. As negative controls, we used natural human IgG1 prepared from myeloma plasma  
719 (Abcam), or incubated wells with PBS alone instead of antigen (referred to as “no  
720 antigen”) or blocking buffer alone instead of antibody (referred to as “no antibody”).

721

#### 722 Binding measurements using biolayer interferometry

723 Kinetic measurements of antibody-antigen interactions were performed using biolayer  
724 interferometry on a ForteBio Octet 96 instrument with anti-human IgG Fc capture (AHC)  
725 biosensors. All assays were carried out in PBS with 1% BSA and 0.05% Tween-20 with a  
726 total volume of 250 uL per well using the following protocol: 60 s baseline, 300 s loading  
727 of antibody, 60 s baseline, 300 s association of antigen, and dissociation of variable  
728 duration up to 600 s for high affinity interactions. Antibody was loaded at 1.5 ng/uL and  
729 antigen concentrations ranged from 2.5 to 100 nM. Between assays, sensors were



730 regenerated by cycling between assay buffer and 10 mM glycine pH 1.5 for 30 s, then  
731 quenched for 30 s in assay buffer. Data were processed using ForteBio software and  
732 custom Python scripts to perform global fitting of a 1:1 binding model across 2–5 antigen  
733 concentrations after double reference subtraction (using buffer only and analyte only  
734 conditions).

735 To determine whether antibodies bind similar or overlapping epitopes,  
736 competitive binding of antibody pairs to a specific antigen was characterized using anti-  
737 penta-HIS (HIS1K) biosensors. We used the following protocol: 60 s baseline, 300 s  
738 loading of antigen, 60 s baseline, 900 s association of blocking antibody, 60 s baseline,  
739 600 s association of test antibody. Antigen was HA H1N1 A/New Caledonia/20/1999  
740 with an isoleucine zipper trimerization domain and polyhistidine tag obtained as a gift  
741 from Dr. Peter Kim and used at 25 nM. Blocking antibodies were used at 400 nM and  
742 included MEDI8852 (24), CR9114 (25), CH65 (26), H2897 (27), and 6649 (28) obtained  
743 as gifts from Dr. Peter Kim. Test antibodies were used at 100 nM and included L3N1 and  
744 L3N6. As a control, self-blocking assays were performed using the same antibody for  
745 blocking and test steps, except with test antibody at 100 nM. Data were processed using  
746 ForteBio software and custom Python scripts. We note that complete blocking was  
747 observed between MEDI8852 and CR9114, which have overlapping epitopes. Partial  
748 blocking was observed between 6649 and H2897, which have partially overlapping  
749 epitopes.

750

#### 751 Data and code availability

752 Sequence data, preprocessed data, and code will be made freely available at the time of  
753 publication.

754

Figure S1

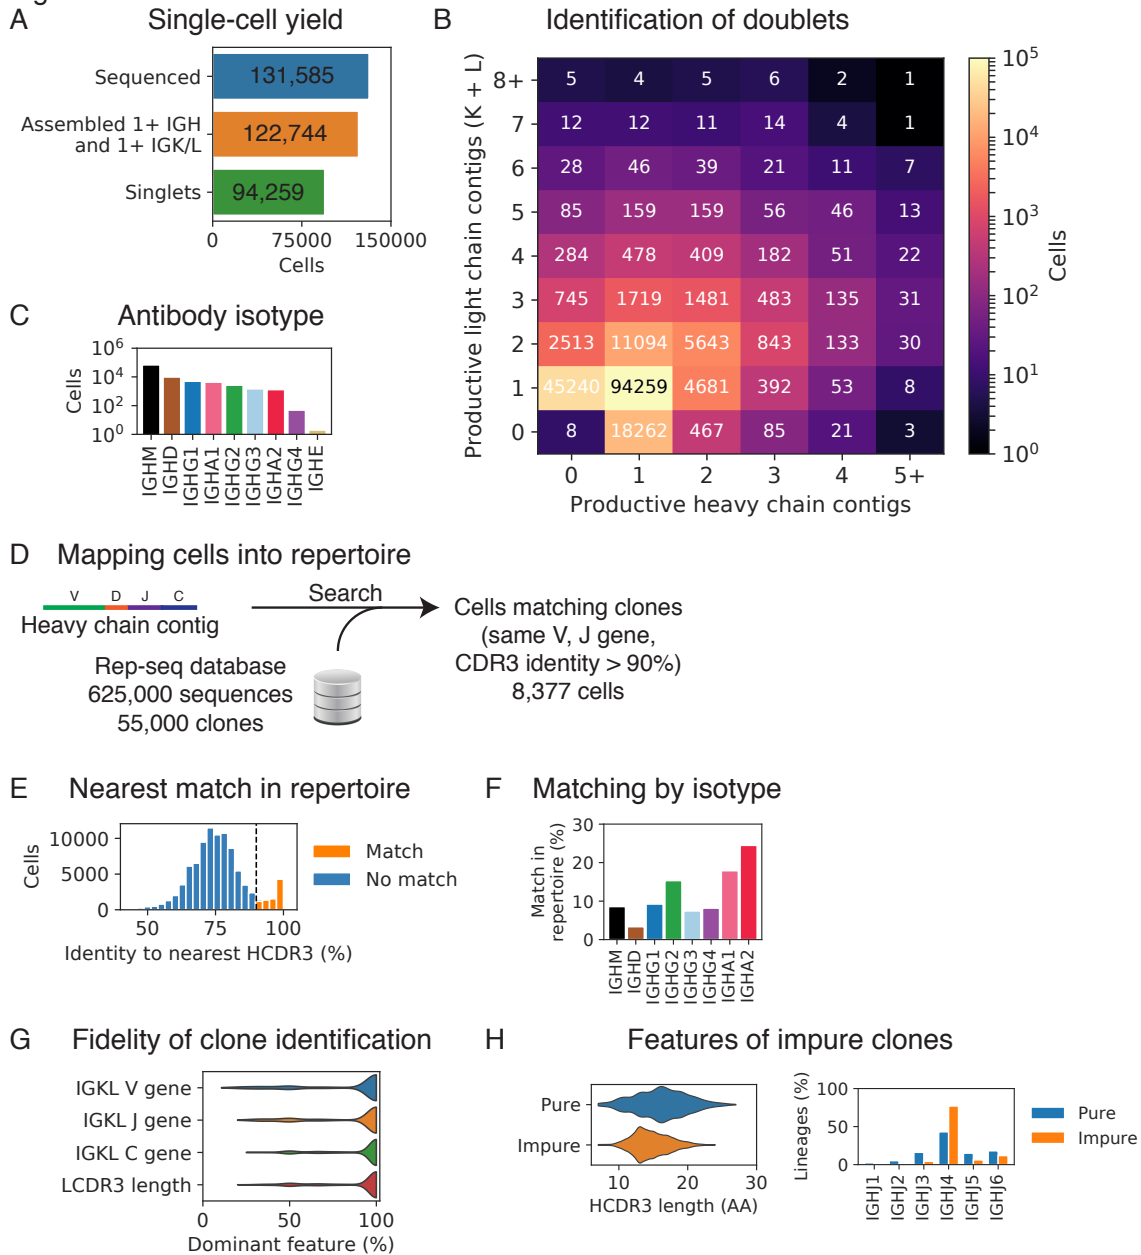

755

756

757

**Figure S1. Performance and features of integrated single-cell and antibody repertoire sequencing measurements.**

758

(A) Number of single cells that were sequenced, had at least one productive heavy (IGH)

759

and one light (IGK/L) chain gene assembled, or had exactly one productive heavy and

760

one productive light chain gene assembled (singlets). (B) Doublets were identified and

761

removed based on the number of productive heavy and light chain contigs assembled. (C)

762

Isotype of antibodies from single B cells were determined based on the heavy chain

763

constant region sequence. (D) Single B cells were mapped to clones detected by

764

repertoire sequencing using a custom search algorithm. Matches required usage of the

765

same V and J genes and HCDR3 identity >90%. (E) HCDR3 identity of nearest match in

766

repertoire sequences. Dashed line indicates cutoff of 90% HCDR3 identity. (F) Isotypes

767

of antibodies in the single cells that matched clones detected by repertoire sequencing (n

768 = 8,377) (**G**) Fidelity of clone identification was determined by assessing the fraction of  
769 single cells sharing the characteristics of the dominant light chain gene found within the  
770 clone. (**H**) Molecular features of pure and impure clones (as determined based on light  
771 chain characteristics). AA, amino acids.  
772

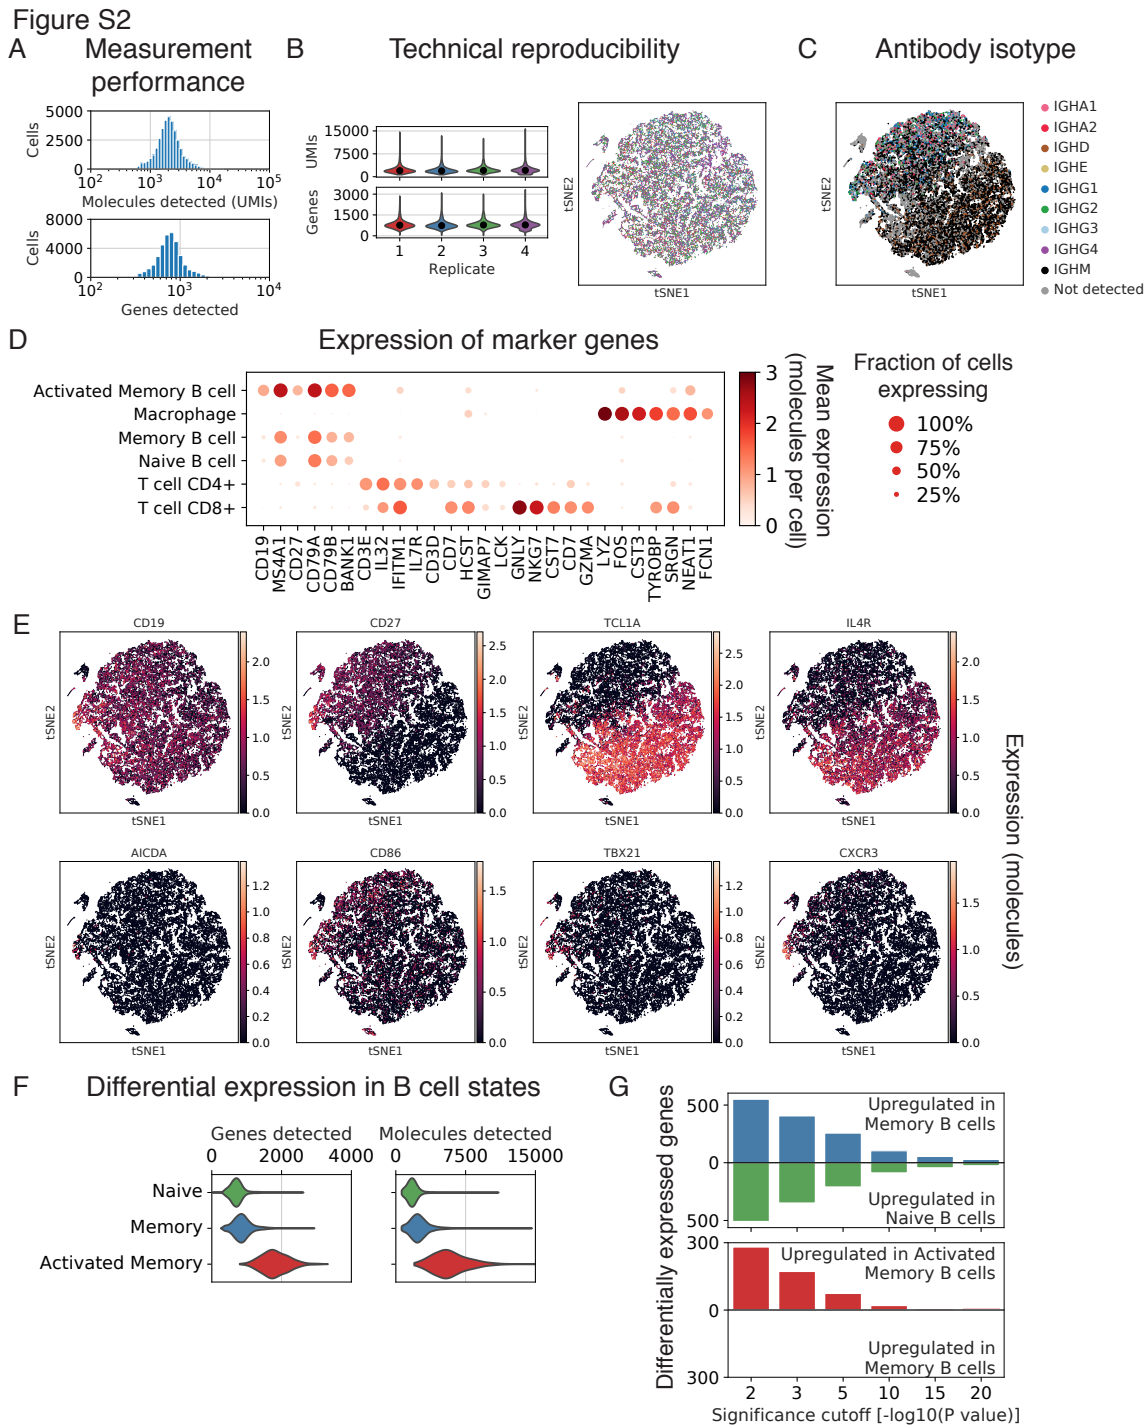

773  
774  
775  
776  
777  
778  
779  
780  
781

**Figure S2. Additional characterization of gene expression in single cells isolated from peripheral blood after influenza vaccination.**

(A) Genes and molecules detected in each individual cell. UMIs, unique molecular identifiers. (B) Distributions of genes and molecules detected in individual cells in technical replicates. Median is indicated by black dot. In right plot, each dot is a cell colored by technical replicate of origin, according to the colors in left plots. tSNE, t-distributed Stochastic Neighbor Embedding. (C) Isotypes of antibodies in single cells were determined based on the heavy chain constant region gene. (D) Clusters were

782 annotated as distinct cell types and states based on expression of established marker  
783 genes. Each dot is a cell. (E) Expression of selected established marker genes and genes  
784 of immunological interest in single cells. Each dot is a cell. (F) Distributions of genes and  
785 molecules detected in B cells in distinct states. (G) Differential expression analysis  
786 identified genes upregulated in naïve compared to memory B cells (green), memory  
787 compared naïve B cells (blue), and activated memory compared to memory B cells (red)  
788 across a range of significance cutoffs.  
789



Figure S3

A Features of vaccine-responsive antibody lineages

| Lineage name | Antibodies produced | Antibodies sequenced | Abundance at D7 (%) | FC D0 to D7 | HV gene | HJ gene | HCDR3 length (AA) | LV gene | LJ gene | LCDR3 length (AA) |
|--------------|---------------------|----------------------|---------------------|-------------|---------|---------|-------------------|---------|---------|-------------------|
| L1           | 5                   | 48                   | 8.5                 | 4360        | V3-15   | J5      | 16                | LV6-57  | LJ2     | 12                |
| L2           | 5                   | 40                   | 6.7                 | ∞           | V4-59   | J4      | 17                | LV2-23  | LJ3     | 12                |
| L3           | 7                   | 7                    | 0.2                 | ∞           | V4-34   | J3      | 19                | KV1-39  | KJ3     | 5                 |
| L4           | 3                   | 3                    | 0.1                 | 62          | V1-3    | J6      | 20                | KV3-20  | KJ3     | 9                 |
| L5           | 1                   | 1                    | 0.1                 | ∞           | V4-59   | J4      | 19                | LV2-23  | LJ3     | 11                |

B

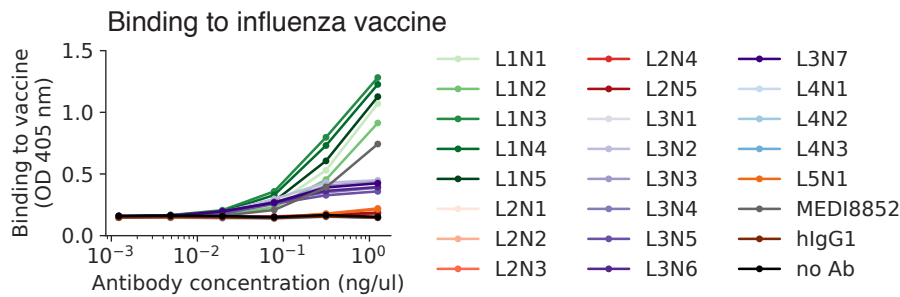

C

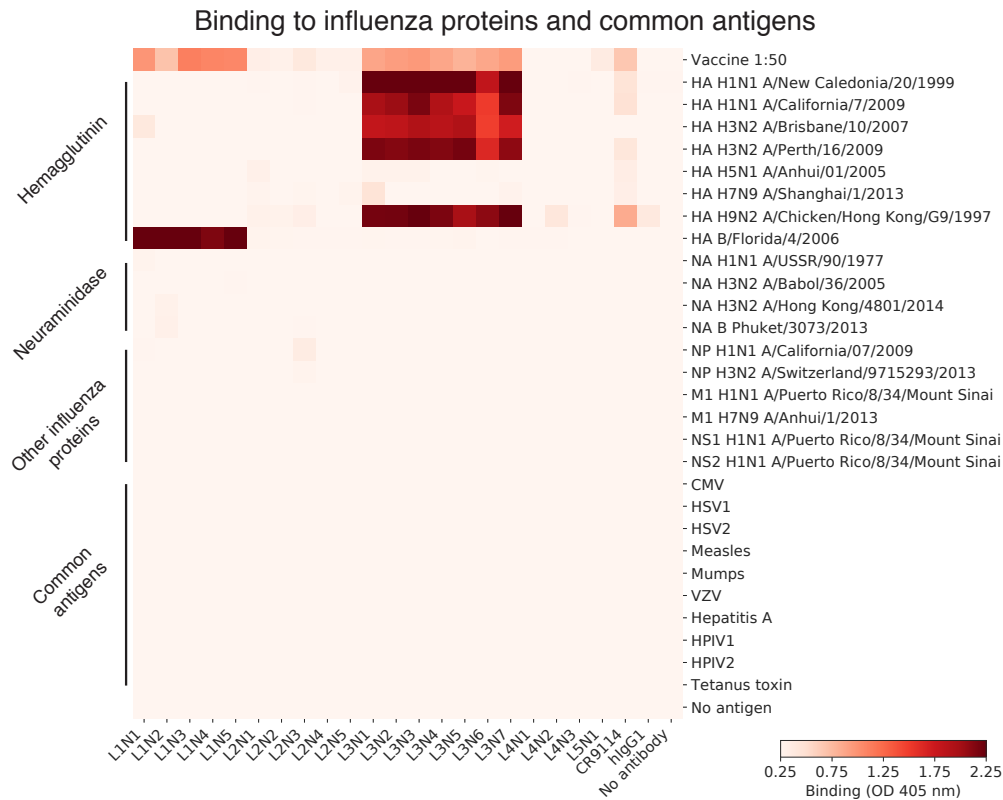

790

791

792

**Figure S3. Molecular features and functional characterization of influenza vaccine-responsive antibodies.**

793 (A) Molecular features and population dynamics of vaccine-responsive antibody clones.

794 FC, fold-change; D0, day 0 after vaccination; D7, day 7 after vaccination; AA, amino

795 acids. (B and C) Binding of vaccine-responsive antibodies to the vaccine given to the

796 subject (trivalent inactivated influenza vaccine from the 2011–2012 flu season) (B) and

797 to purified influenza proteins and common viral and bacterial antigens (C) was measured

798 using enzyme-linked immunosorbent assay (ELISA). HA, hemagglutinin; NA,

799 neuraminidase; NP, nucleoprotein, M1, matrix protein 1; NS1, non-structural protein 1;  
800 NS2, non-structural protein 2; CMV, cytomegalovirus; HSV1/2, herpes simplex virus  
801 1/2; VZV, varicella zoster virus; HPIV1/2, human parainfluenza virus 1/2; OD, optical  
802 density; hIgG1, human IgG1; no Ab, no antibody.  
803

Figure S4

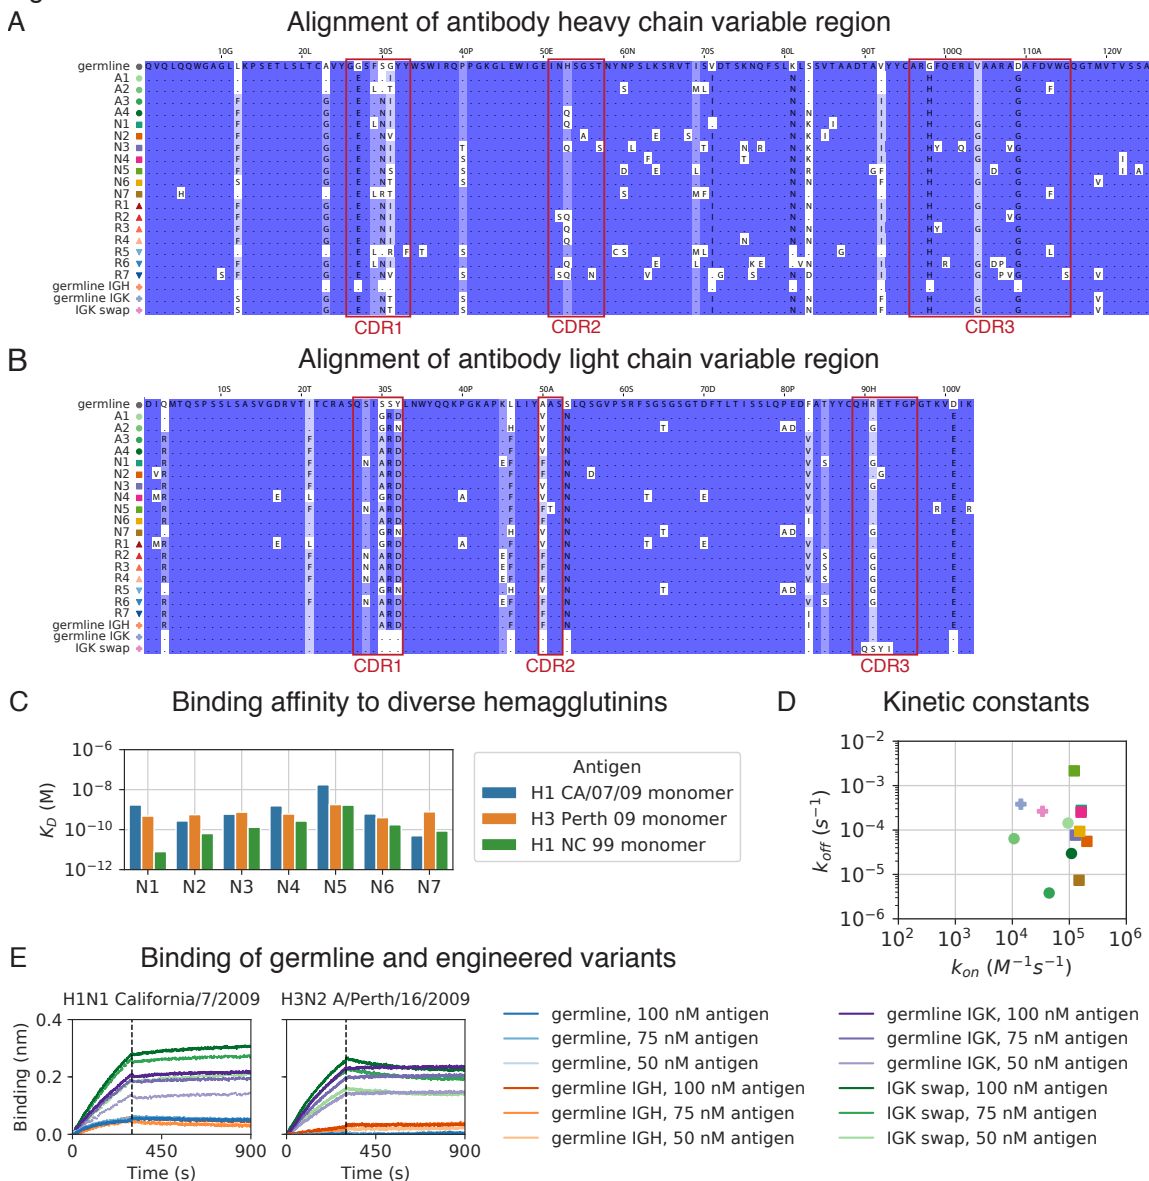

804

805

**Figure S4. Molecular features and functional characterization of a broadly binding anti-influenza antibody clone.**

806

807 (A and B) Alignments of heavy (A) and light (B) chain variable region protein sequences

808 for antibodies and engineered variants from clone L3. CDRs are indicated by red boxes.

809 Background color indicates conservation of the position. Residues that are the same as

810 germline are indicated by “.”. (C and D) Equilibrium constants ( $K_D$ ) (C) and kinetic

811 constants ( $k_{on}$  and  $k_{off}$ ) (D) of binding between antibody variants from L3 and

812 hemagglutinin variants were measured using biolayer interferometry. Symbols denoting

813 variants are shown in Figure S4A. (E) Kinetics of binding and unbinding of germline and

814 engineered antibody variants to H1 (A/California/7/2009) (left) and H3

815 (A/Perth/16/2009) (right) hemagglutinin antigens. Colors indicate antibody variants and

816 antigen concentration. Dashed line indicates transition from association to dissociation

817 step. Note that determination of equilibrium binding constants (shown in Figure 4C) was  
818 performed at lower antigen concentrations (not shown here).  
819

Figure S5

A

Epitope mapping by cross-competition

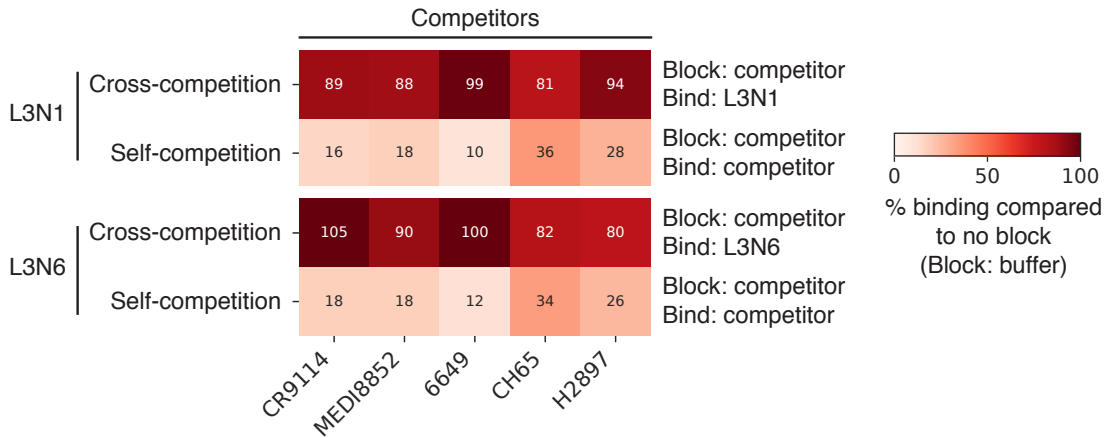

B

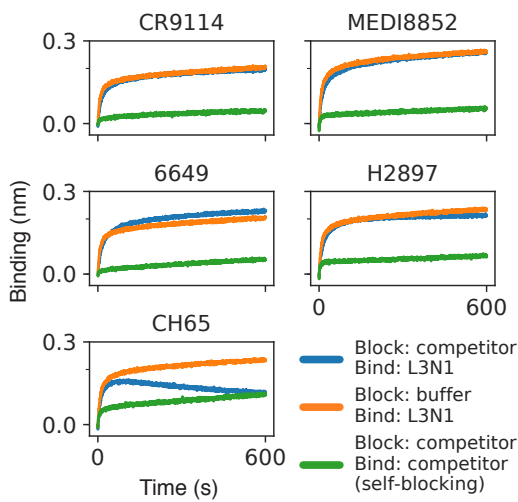

C

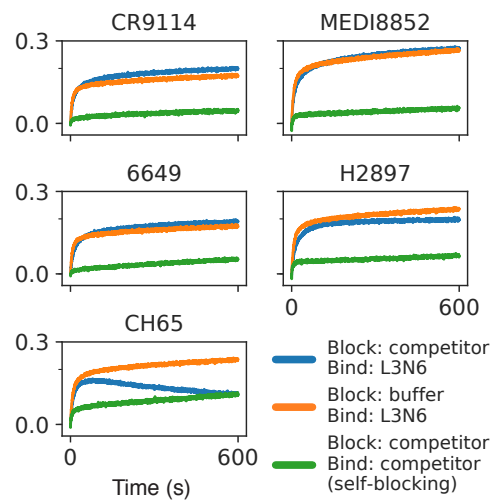

D Unbinding of competitors

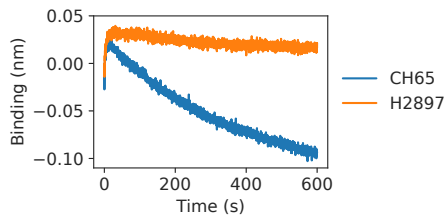

820

821

**Figure S5. Determination of antibody epitopes by cross-competition.**

822

(A–C) Binding of antibodies L3N1 and L3N6 to trimeric hemagglutinin (H1 A/New

823

Caledonia/20/1999) following blocking with potentially competing antibodies was

824

determined using biolayer interferometry. To summarize the data (A), binding was

825

determined after 50 s and compared with binding observed without blocking (using

826

buffer instead of a potentially competing antibody during the blocking step). Numerical

827

values are shown in each condition. Kinetics of binding are shown for L3N1 (B) and

828

L3N6 (C). (D) Kinetics of unbinding for competitors CH65 and H2897 are shown. Fast

829

unbinding of CH65 explains the observed decrease in binding in (B and C).

830



831 **Table S1. Genes that are differentially expressed between naïve and memory B cells.**

832 Differential expression between single-cell transcriptional profiles of naïve (n = 18,953)  
833 and memory (n = 16,653) B cells was determined using the negative binomial exact test  
834 with the Benjamini-Hochberg correction for multiple testing. Genes with  $P < 0.05$  are  
835 shown. Genes upregulated in memory B cells are shown first, then genes upregulated in  
836 naïve B cells.

837

838 **Table S2. Genes that are differentially expressed between memory and activated**  
839 **memory B cells.**

840 Differential expression between single-cell transcriptional profiles of memory (n =  
841 16,653) and activated memory (n = 421) B cells was determined using the negative  
842 binomial exact test with the Benjamini-Hochberg correction for multiple testing. Genes  
843 with  $P < 0.05$  are shown. Genes upregulated in activated memory B cells are shown first,  
844 then genes upregulated in memory B cells.

845
